# Supplementary material
Source: PubMed Central journal article supplement (PMC2141834)

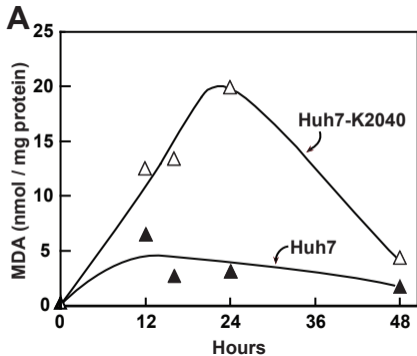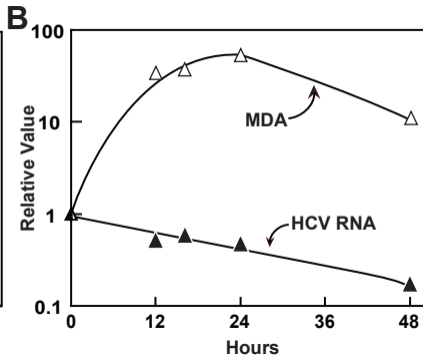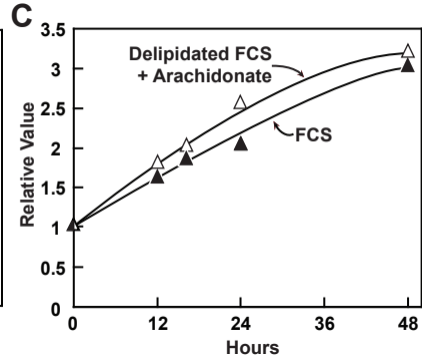

Supplement: pnas_0708423104_1.pdf [file pnas_0708423104_1.pdf]
